# Supplementary material for: Palmar Digital Neuropathy With Anatomical Variation of Median Nerve: Usefulness of Orthodromic Technique: A Case Report
Source: PubMed Central journal article supplement — Ann Rehabil Med. 2019 Jun 28;43(3):341–6. doi: 10.5535/arm.2019.43.3.341 (PMC6637065; doi:10.5535/arm.2019.43.3.341), 2019-06-28
Supplement: arm-2019-43-3-341-suppl.pdf [file arm-2019-43-3-341-suppl.pdf]

SUPPLEMENTARY MATERIALS

**Table S1.** Needle electromyography study

|                     | Insertional activity | Spontaneous activity | Motor unit action potentials |            |              | IP   |          |
|---------------------|----------------------|----------------------|------------------------------|------------|--------------|------|----------|
|                     |                      |                      | Normal                       | Polyphasia | Amplitude    |      | Duration |
| Lt. brachioradialis | Normal               | -                    | Normal                       | -          | -            | -    | Full     |
| Lt. pronator teres  | Normal               | -                    | Normal                       | -          | -            | -    | Full     |
| Lt. EDC             | Normal               | -                    | Normal                       | -          | -            | -    | Full     |
| Lt. FDI             | Normal               | -                    | Normal                       | -          | -            | -    | Full     |
| Lt. APB             | Normal               | -                    | -                            | -          | Large (8 mV) | Long | Reduced  |

IP, interference pattern; EDC, extensor digitorum communis; FDI, first dorsal interosseus; APB, abductor pollicis brevis.

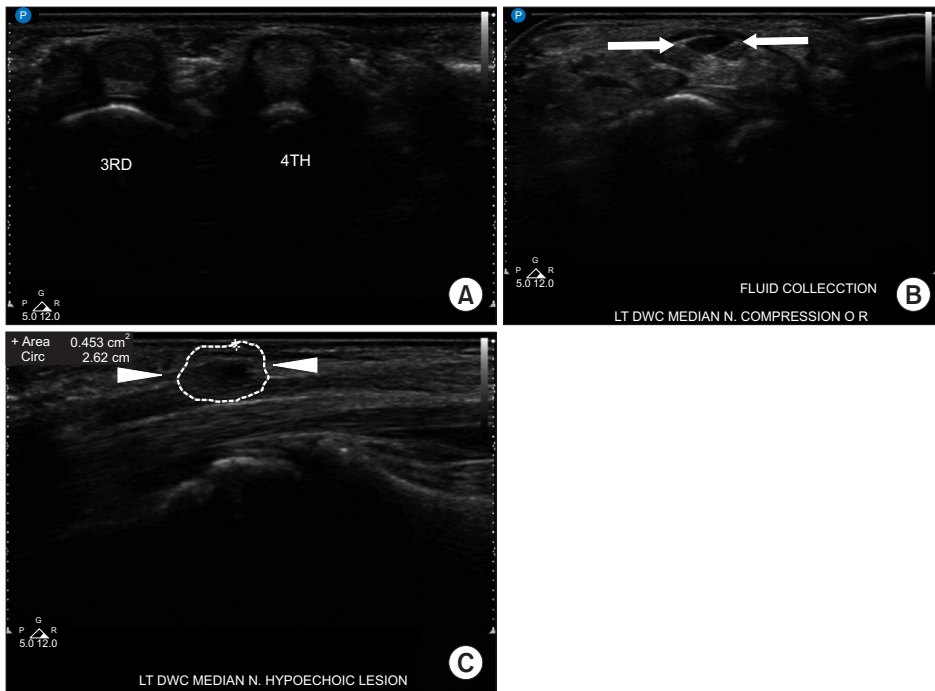

**Fig. S1.** Transverse ultrasonogram demonstrated no abnormal finding in the palm of left hand including a 3rd web space (A) and compression and swelling of median nerve with fluid collection at distal wrist crease (B and C). Arrows indicate fluid collection, and arrowheads indicate median nerve.
